# Supplementary material for: Effect of processing and end groups on the crystal structure of polypeptoids studied by cryogenic electron microscopy at atomic length scales
Source: Royal Society of Chemistry journal article supplement (doi:10.1039/c9sm00633h), 2019-01-01
Supplement: c9sm00633h1.pdf [file c9sm00633h1.pdf]

# Supplementary Materials for

## Effect of Processing and End Groups on the Crystal Structure of Polypeptoids Studied by Cryogenic Electron Microscopy on Atomic Length Scales

*Xi Jiang<sup>1&</sup>, Sunting Xuan<sup>2&</sup>, Joyjit Kundu<sup>2#</sup>, David Prendergast<sup>2</sup>, Ronald N. Zuckermann<sup>2\*</sup>,  
Nitash P. Balsara<sup>1,3\*</sup>*

<sup>1</sup> Materials Sciences Division, Lawrence Berkeley National Laboratory, Berkeley, CA 94720, United States.

<sup>2</sup> Molecular Foundry, Lawrence Berkeley National Laboratory, Berkeley, CA 94720, United States.

<sup>3</sup> College of Chemistry, University of California, Berkeley, CA 94720, United States.

*& Authors contributed equally.*

<sup>#</sup> Present address: Department of Chemistry, Duke University, Durham, North Carolina 27708 United States

<sup>\*</sup> Corresponding authors: [rnzuckermann@lbl.gov](mailto:rnzuckermann@lbl.gov); [nbalsara@berkeley.edu](mailto:nbalsara@berkeley.edu).

***Submission to Soft Matter***

**List of supplementary materials:**

**Figure S1.** LC-MS trace of pNdc<sub>9</sub>-pNte<sub>9</sub> solution

**Figure S2.** LC-MS trace of Cl-pNdc<sub>9</sub>-pNte<sub>9</sub> solution

**Figure S3.** LC-MS trace of I-pNdc<sub>9</sub>-pNte<sub>9</sub> solution

**Figure S4.** TEM micrograph of pNdc<sub>9</sub>-pNte<sub>9</sub> nanosheets obtained by very slow evaporation.

**Table S1.** Parameters of analyzed cryo-EM micrographs

**Figure S5.** FFTs of Motifs in pNdc<sub>9</sub>-pNte<sub>9</sub> nanosheets obtained by difference processes.

**Figure S6.** Structure of the self-assembled Cl-pNdc<sub>9</sub>-pNte<sub>9</sub> and I-pNdc<sub>9</sub>-pNte<sub>9</sub> nanosheets prepared by very slow evaporation.

**Figure S7.** Motifs in Cl-pNdc<sub>9</sub>-pNte<sub>9</sub> and I-pNdc<sub>9</sub>-pNte<sub>9</sub> nanosheets prepared by very slow evaporation.

**Figure S8.** FFTs of Motifs in Cl-pNdc<sub>9</sub>-pNte<sub>9</sub> and I-pNdc<sub>9</sub>-pNte<sub>9</sub> nanosheets in Figure S7.

**Figure S9.** Distribution maps of motifs in the nanosheets

**Figure S10.** Rotation average 1-D plots of FFTs in Figure 3 and the indexed Miller indices.

**Figure S11.** AFM height image of nanosheets prepared by fast evaporation.

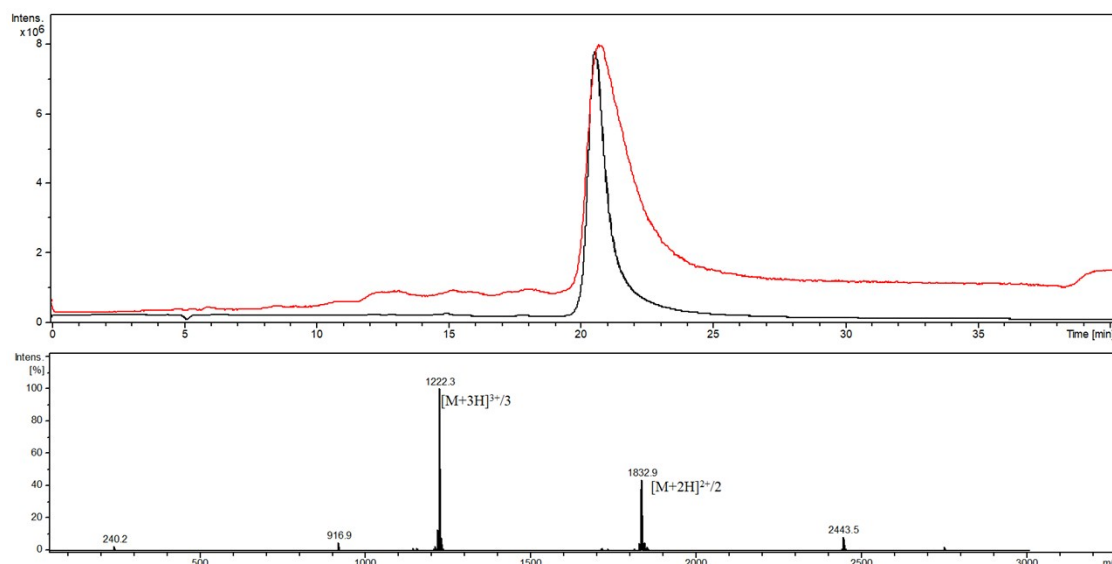

**Figure S1. LC-MS trace of Ndc<sub>9</sub>-Nte<sub>9</sub> sheet solution.** with gradient of 70-95% solvent B in 20 min (B is 10% isopropanol in acetonitrile and A is 10% isopropanol in water). Black plot in top panel represents LC trace; red plot in top panel represents total ion chromatogram and bottom panel shows mass spectrum. Note: the sheet solution was lyophilized and re-dissolved in a mixture of acetonitrile/isopropanol/water for LC-MS analysis.

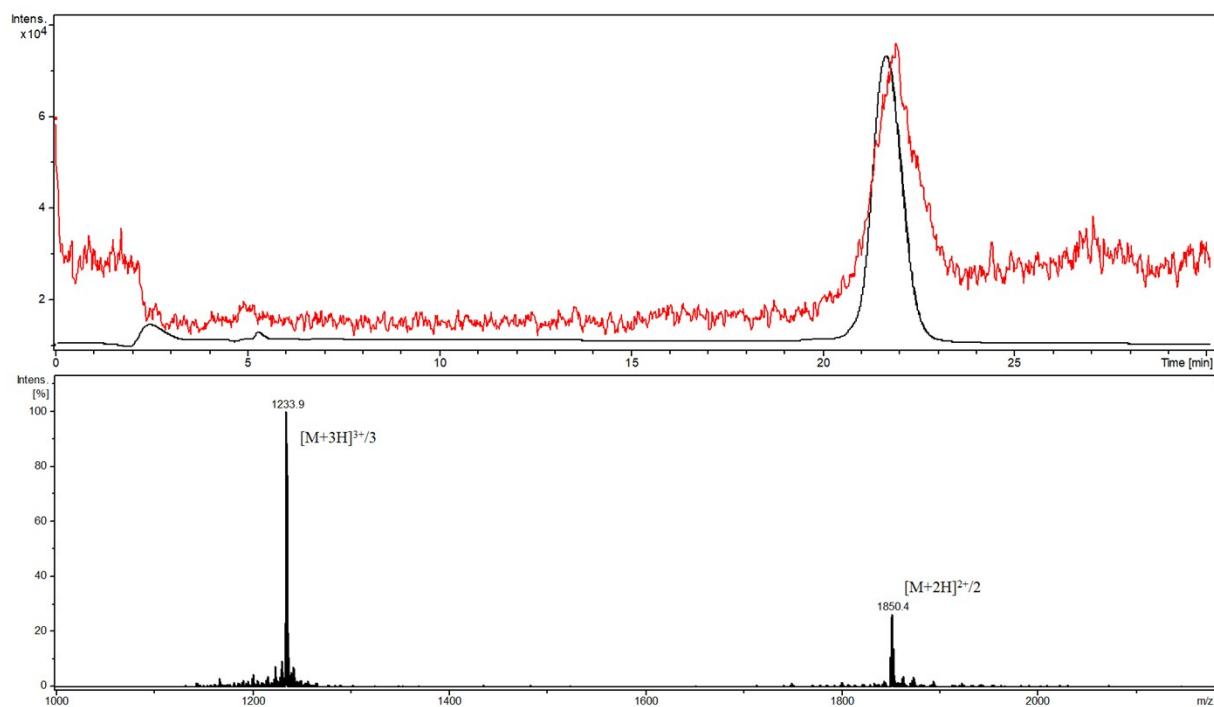

**Figure S2. LC-MS trace of CI-Ndc<sub>9</sub>-Nte, sheet solution.** with gradient of 70-95% solvent B in 20 min (B is 10% isopropanol in acetonitrile and A is 10% isopropanol in water). Black plot in top panel represents LC trace; red plot in top panel represents total ion chromatogram and bottom panel shows mass spectrum. Note: the sheet solution was lyophilized and re-dissolved in a mixture of acetonitrile/isopropanol/water for LC-MS analysis.

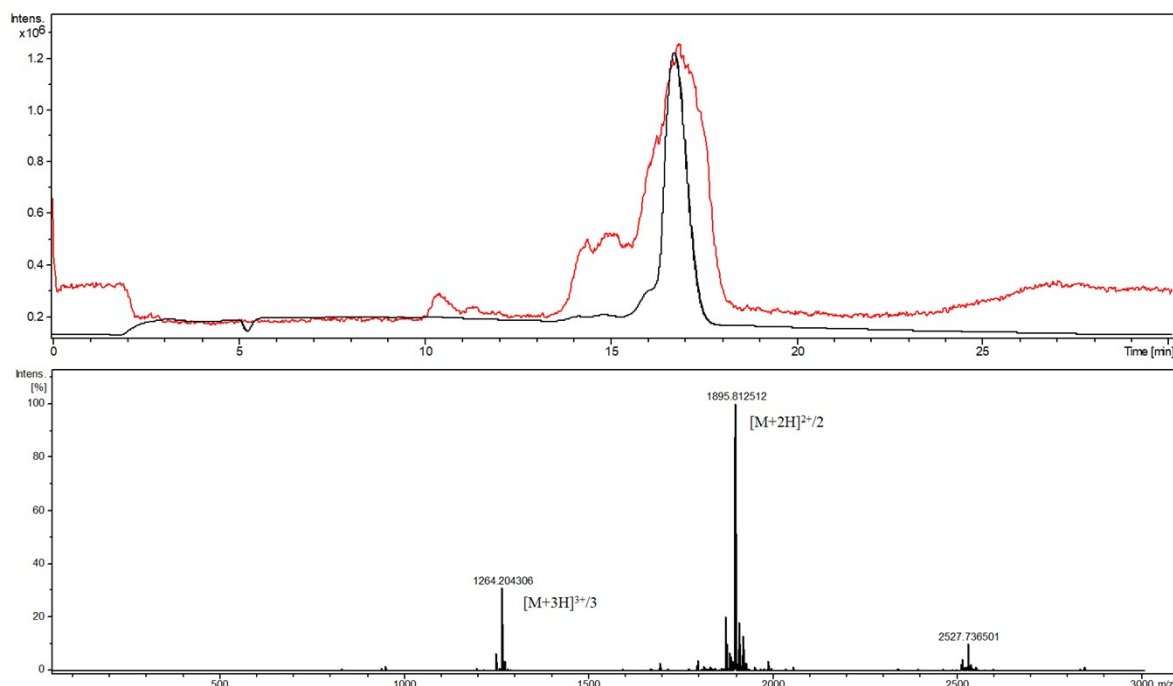

**Figure S3. LC-MS trace of I-Ndc<sub>9</sub>-Nte<sub>9</sub> sheet solution.** with gradient of 75-95% solvent B in 20 min (B is 10% isopropanol in acetonitrile and A is 10% isopropanol in water). Black plot in top panel represents LC trace; red plot in top panel represents total ion chromatogram and bottom panel shows mass spectrum. Note: the sheet solution was lyophilized and re-dissolved in a mixture of acetonitrile/isopropanol/water for LC-MS analysis.

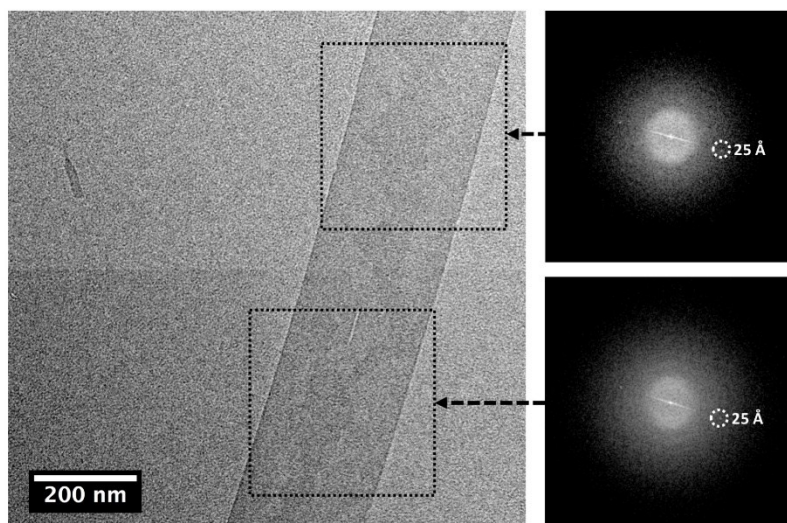

**Figure S4. TEM micrograph of pNdc<sub>9</sub>-pNte<sub>9</sub> nanosheets obtained by very slow evaporation.** The Fourier transforms obtained at different positions along a ribbon like nanosheet show identical featured reflections at 25 Å which suggest the presence of long-range order in polypeptoid crystalline nanosheets

**Table S1. Parameters of analyzed cryo-EM micrographs**

| Nanosheets                                     | Number of micrographs | Defocus range <sup>a</sup> | Number of boxes extracted from the micrographs | Highest resolution of Thon rings in the FFTs of micrographs <sup>a</sup> | Highest resolution of reflections in the FFTs of averaged images |
|------------------------------------------------|-----------------------|----------------------------|------------------------------------------------|--------------------------------------------------------------------------|------------------------------------------------------------------|
| pNdc <sub>9</sub> -pNte <sub>9</sub> (fast)    | 12                    | 6595-11143 Å               | 166117                                         | 2.7-2.9 Å                                                                | 2.1 Å                                                            |
| pNdc <sub>9</sub> -pNte <sub>9</sub> (medium)  | 4                     | 5451-7765 Å                | 70902                                          | 1.9-3.0 Å                                                                | 2.4 Å                                                            |
| pNdc <sub>9</sub> -pNte <sub>9</sub> (slow)    | 10                    | 2773-4978 Å                | 262826                                         | 1.9-2.5 Å                                                                | 2.1 Å                                                            |
| Cl-pNdc <sub>9</sub> -pNte <sub>9</sub> (slow) | 13                    | 2825-5139 Å                | 346113                                         | 1.9-2.4 Å                                                                | 2.1 Å                                                            |
| I-pNdc <sub>9</sub> -pNte <sub>9</sub> (slow)  | 4                     | 2484-2960 Å                | 56860                                          | 1.9-2.6 Å                                                                | 2.1 Å                                                            |

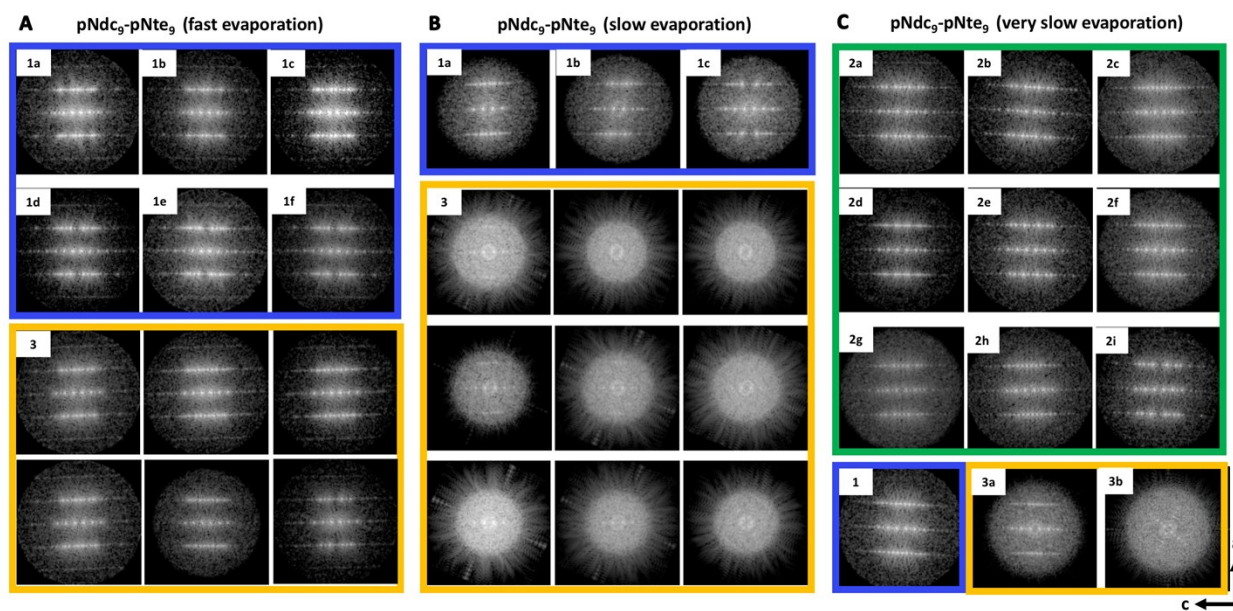

**Figure S5. FFTs of Motifs in pNdc<sub>9</sub>-pNte<sub>9</sub> nanosheets obtained by difference processes.** As described in Figure 4, boxes were sorted and averaged assuming the presence of 12 classes. These classes for naturally into two distinct groups that contain ordered motifs: anti-parallel V-shaped motifs (group 1 identified by a blue outline), parallel V-shaped motifs (group 2 identified by a green outline). Classes that were inconsistent with the molecule shown in Figure 1C are collectively referred to as disordered (group 3 identified by a yellow outline). FFTs of motifs in the pNdc<sub>9</sub>-pNte<sub>9</sub> nanosheets obtained by **A**: fast evaporation, **B**: slow evaporation, **C**: very slow evaporation. The *a* and *c* dimensions demonstrate the spacings as shown in the atomic model in Figure 1C. Bright areas in all images represent the electron dense regions. The *a* and *c* dimensions demonstrate the spacings as shown in the atomic model in Figure 1B and Figure 5.

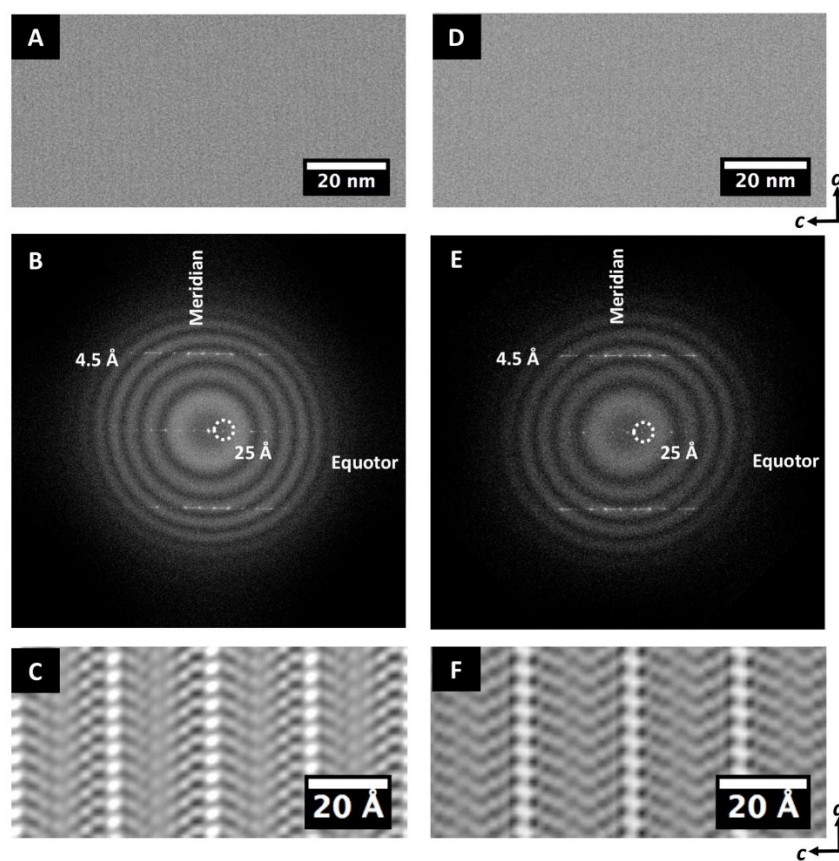

**Figure S6. Structure of the self-assembled Cl-pNdc<sub>9</sub>-pNte<sub>9</sub> and I-pNdc<sub>9</sub>-pNte<sub>9</sub> nanosheets prepared by very slow evaporation.** **A.** A section of a low-dose cryo-EM micrograph of vitrified hydrated Cl-pNdc<sub>9</sub>-pNte<sub>9</sub> nanosheets. **B.** The FFT of the low-dose cryo-EM micrograph in A showing reflections and Thon rings due to the thin carbon support. The dashed circle indicates the reflection corresponding to 25 Å which is the spacing between adjacent rows of pNdc backbones. The reflections at 4.5 Å indicate the spacing between two pNdc backbones. **C.** A section of Fourier filtered image of FFT in B. Reflections in B are filtered by applying a mask with 1 pixel diameter at each reflection. **D.** A section of a low-dose cryo-EM micrograph of vitrified hydrated I-pNdc<sub>9</sub>-pNte<sub>9</sub> nanosheets. **E.** The FFT of the low-dose cryo-EM micrograph in D showing reflections and Thon rings due to the thin carbon support. The dashed circle indicates the reflection corresponding to 25 Å which is the spacing between adjacent rows of pNdc backbones. The reflections at 4.5 Å

indicate the spacing between two pNdc backbones. **F.** A section of Fourier filtered image of FFT in E. Reflections in E are filtered by applying a mask with 1 pixel diameter at each reflection. Bright areas in all images represent the electron dense regions. The high symmetry images in C, F, and J are artifacts due to averaging over distinct motifs.

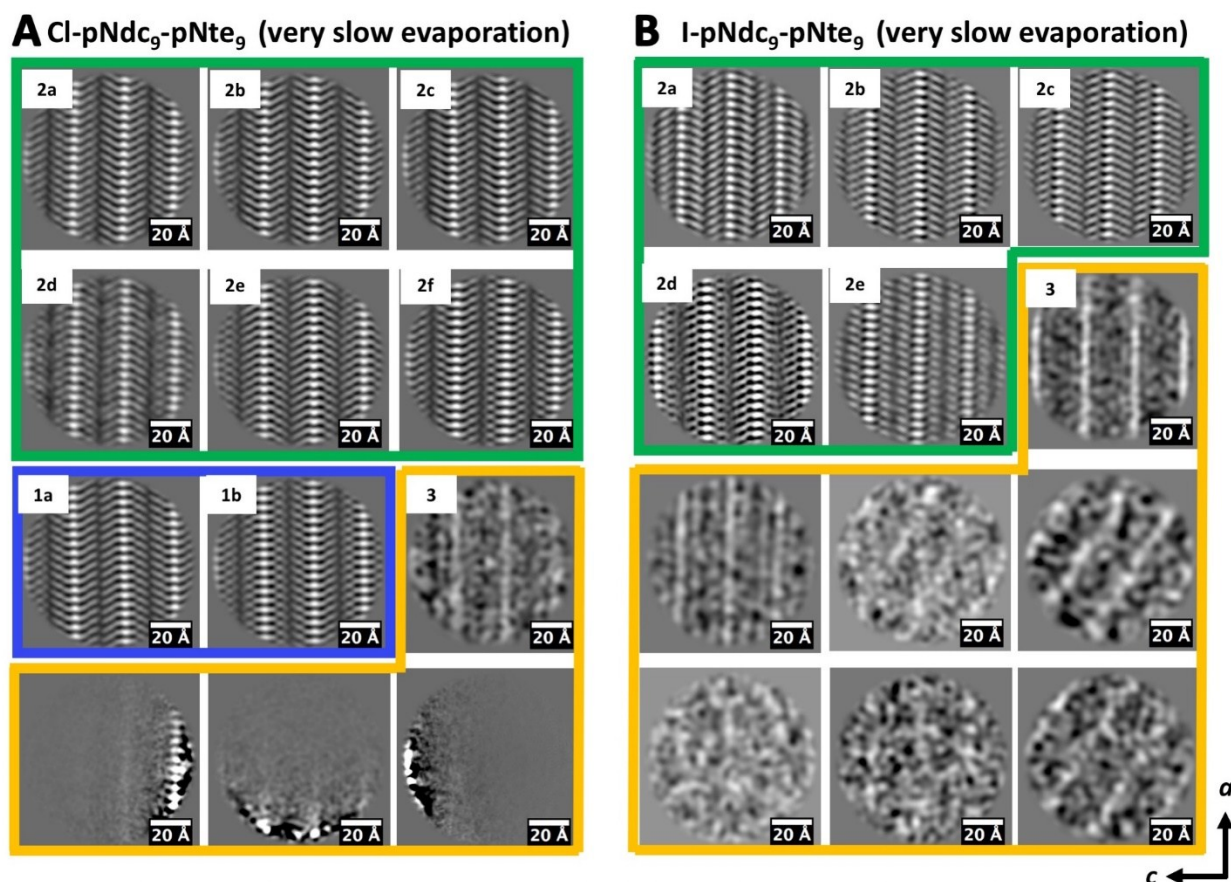

**Figure S7. Motifs in Cl-pNdc<sub>9</sub>-pNte<sub>9</sub> and I-pNdc<sub>9</sub>-pNte<sub>9</sub> nanosheets prepared by very slow evaporation.** Boxes were sorted and averaged assuming the presence of 12 classes. These classes naturally fall into two distinct groups that contain ordered motifs: anti-parallel V-shaped motifs (group 1 identified by a blue outline), parallel V-shaped motifs (group 2 identified by a green outline). Classes that were inconsistent with the molecule shown in Figure 1C are collectively referred to as disordered (group 3 identified by a yellow outline). **A.** Motifs of Cl-pNdc<sub>9</sub>-pNte<sub>9</sub> nanosheets, **B:** Motifs of I-pNdc<sub>9</sub>-pNte<sub>9</sub> nanosheets. The *a* and *c* dimensions demonstrate the spacings as shown in the atomic model in Figure 1C. Bright areas in all images represent the electron dense regions.

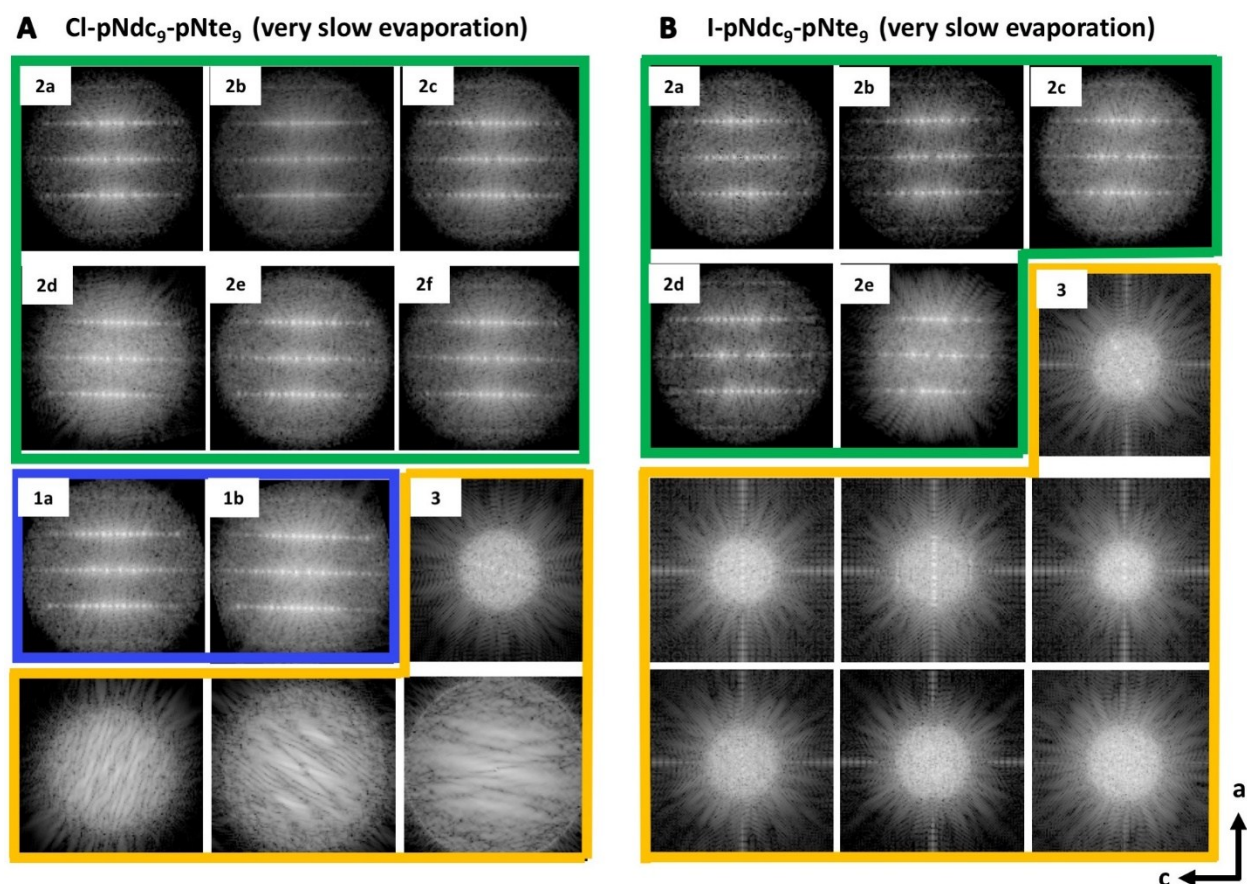

**Figure S8. FFTs of Motifs in Cl-pNdc<sub>9</sub>-pNte<sub>9</sub> and I-pNdc<sub>9</sub>-pNte<sub>9</sub> nanosheets shown in Figure S7.** As described in Figure S4, boxes were sorted and averaged assuming the presence of 12 classes. These classes naturally fall into two distinct groups that contain ordered motifs: anti-parallel V-shaped motifs (group 1 identified by a blue outline), parallel V-shaped motifs (group 2 identified by a green outline). Classes that were inconsistent with the molecule shown in Figure 1C are collectively referred to as disordered (group 3 identified by a yellow outline). **A.** The FFTs of anti-parallel V-shaped motifs, parallel V-shaped motifs and disordered motifs in Cl-pNdc<sub>9</sub>-pNte<sub>9</sub> nanosheets. **B.** The FFTs of parallel V shape motifs and unidentified motifs in I-pNdc<sub>9</sub>-pNte<sub>9</sub> (slow) nanosheets. The *a* and *c* dimensions demonstrate the spacings as same as these shown in the atomic model in Figure 1B.

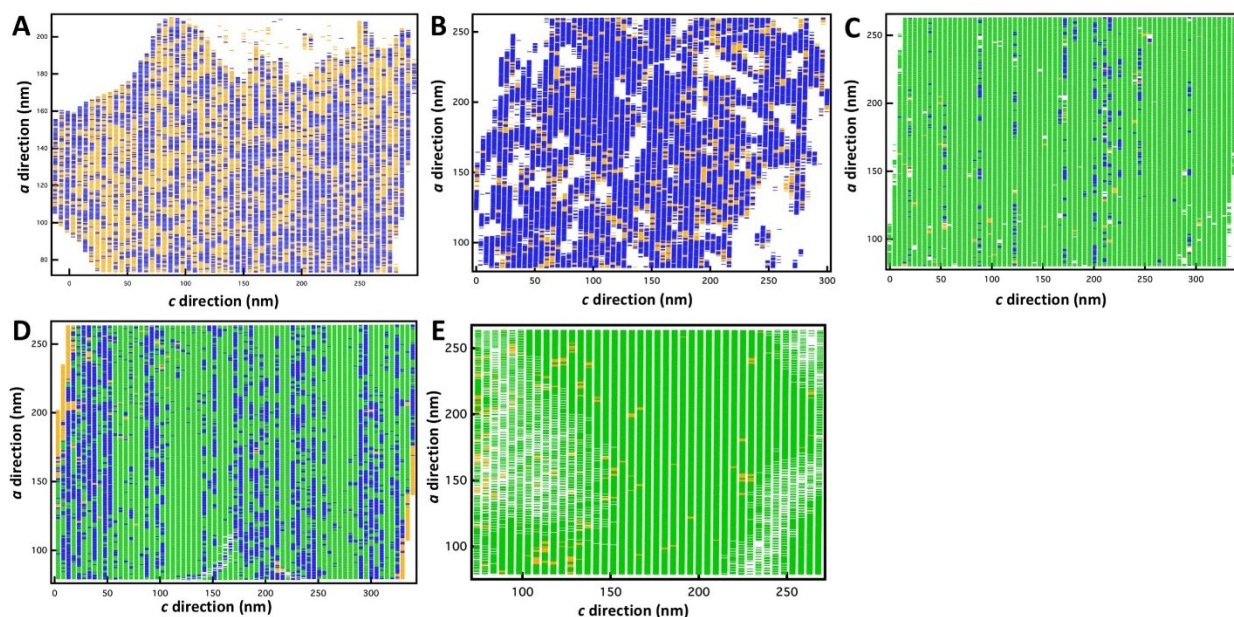

**Figure S9. Distribution maps of motifs in the polypeptoid nanosheets** Each individual rectangle in the maps represents a unit cell. Anti-parallel V-shaped motifs are shown as blue boxes. Parallel V-shaped motifs are shown as green boxes. Disordered motif are shown as yellow boxes. **A:** pNdc<sub>9</sub>-pNte<sub>9</sub> nanosheet obtained by fast evaporation, **B:** pNdc<sub>9</sub>-pNte<sub>9</sub> nanosheet obtained by slow evaporation, **C:** pNdc<sub>9</sub>-pNte<sub>9</sub> nanosheet obtained by very slow evaporation. **D:** Cl-pNdc<sub>9</sub>-pNte<sub>9</sub> nanosheet obtained by very slow evaporation, **E:** I-pNdc<sub>9</sub>-pNte<sub>9</sub> nanosheet obtained by very slow evaporation. White areas within the maps represent the regions that were not analyzed.

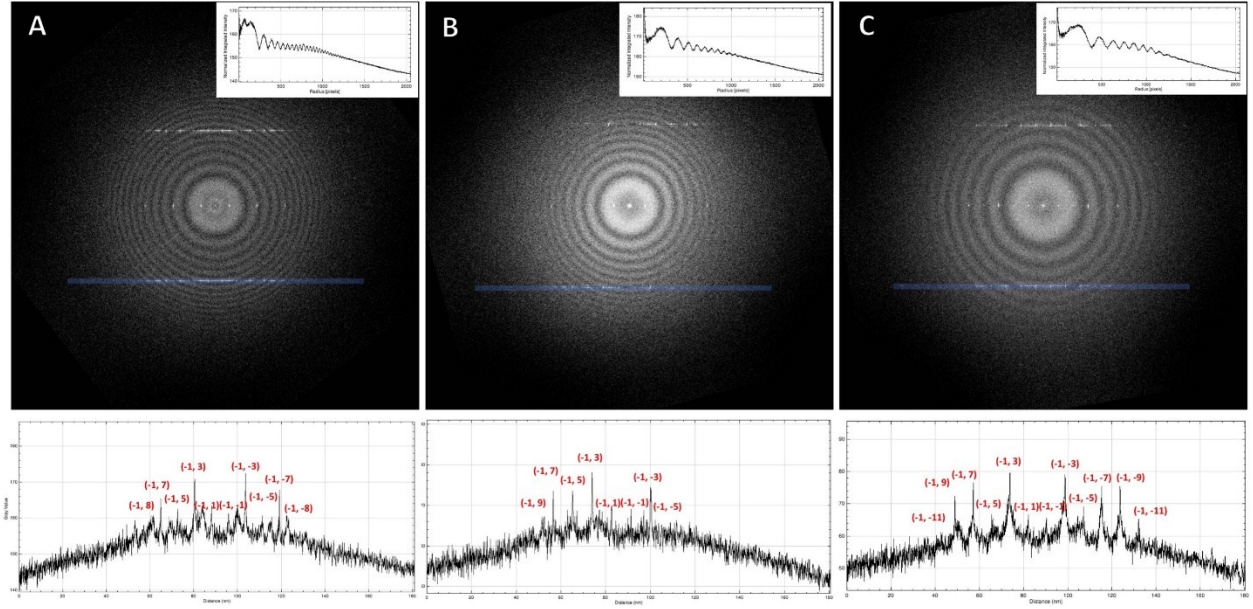

**Figure S10. Rotation average 1-D plots of FFTs in Figure 3 and the indexed Miller indices.**

Insets represent the 1-D rotationally averaged FFTs and the bottom panel show the line profiles as indicated by blue lines in FFTs. Miller indices are shown in red **A**: fast evaporation, **B**: slow evaporation, **C**: very slow evaporation.

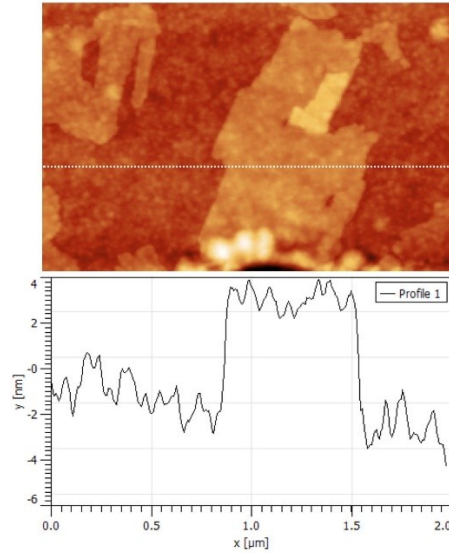

**Figure S11. AFM height image of nanosheets prepared by fast evaporation.** Top panel shows the AFM height image. White dotted line represents the position of measured thickness profile of a monolayer nanosheet (shown in bottom panel)
